# Supplementary material for: Targeted resequencing identifies PTCH1 as a major contributor to ocular developmental anomalies and extends the SOX2 regulatory network
Source: HighWire-hosted journal article supplement (doi:10.1101/gr.196048.115), 2016-02-18
Supplement: Supp_Table_1.xlsx [file Supp_Table_1.xlsx]

## Sheet: Feuil1
Supplementary Table 1 : List of the 407 candidate genes
gene	approved_name	previous_symbols	accession_numbers	refseq_ids	synonyms	chromosome
ACVR1	activin A receptor, type I	ACVRLK2		NM_001105	SKR1, ALK2, ACVR1A	2q23-q24
ACVR1C	activin A receptor, type IC		BC022530	NM_145259	ALK7, ACVRLK7	2q24.2
ADAM17	ADAM metallopeptidase domain 17	TACE	U69611		cSVP, CD156B	2p25
ADAM23	ADAM metallopeptidase domain 23		AB009672	NM_003812	MDC3	2q33
ADH1A	alcohol dehydrogenase 1A (class I), alpha polypeptide	ADH1	M12963	NM_000667		4q23
AES	amino-terminal enhancer of split		GRG5, TLE5	NM_198969	AK094591	19p13.3
ALCAM	activated leukocyte cell adhesion molecule		AK054632	NM_001627	CD166, MEMD	3q13.1
ALDH1A1	aldehyde dehydrogenase 1 family, member A1	PUMB1, ALDH1	K03000		RALDH1	9q21.13
ALDH1A2	aldehyde dehydrogenase 1 family, member A2		AB015228		RALDH2	15q21.2
ALDH1A3	aldehyde dehydrogenase 1 family, member A3	ALDH6	U07919		RALDH3	15q26
ALDOA	aldolase A, fructose-bisphosphate		X05236	NM_000034		16p11.2
ALK	anaplastic lymphoma receptor tyrosine kinase		D45915	NM_004304	CD246	2p23
ALX4	ALX homeobox 4	PFM2	AF294629		FPP, PFM, KIAA1788	11p11.2
AP3B1	adaptor-related protein complex 3, beta 1 subunit		U81504		ADTB3A, HPS2	5q14.1
APBB1IP	amyloid beta (A4) precursor protein-binding, family B, member 1 interacting protein		AB085852	NM_019043	INAG1, RIAM	10p12.1
APLN	apelin		AF179680	NM_017413	apelin, XNPEP2	Xq25
ARNTL	aryl hydrocarbon receptor nuclear translocator-like		D89722	NM_001178	MOP3, JAP3, BMAL1, PASD3, bHLHe5	11p15
ARR3	arrestin 3, retinal (X-arrestin)			NM_004312	ARRX	Xq
ASCL1	achaete-scute complex homolog 1 (Drosophila)		L08424		ASH1, HASH1, bHLHa46	12q22-q23
ATN1	atrophin 1	D12S755E, DRPLA	U23851	NM_001940	B37	12p
ATOH1	atonal homolog 1 (Drosophila)		U61148	NM_005172	HATH1, MATH-1, Math1, bHLHa14	4q22
ATOH7	atonal homolog 7 (Drosophila)		AF418922		Math5, bHLHa13	10q22.2
ATOH8	atonal homolog 8 (Drosophila)		AK074681	NM_032827	HATH6, FLJ14708, bHLHa21	2p11.2
ATP5C1	ATP synthase, H+ transporting, mitochondrial F1 complex, gamma polypeptide 1	ATP5CL1, ATP5C	D16561	NM_005174		10p14
AXIN1	axin 1		AF009674		PPP1R49	16p13.3
AXIN2	axin 2		AF078165	NM_004655	MGC126582, DKFZp781B0869	17q23-q24
B3GALTL	beta 1,3-galactosyltransferase-like		AB101481	NM_194318	B3GTL, B3Glc-T	13q12.3
BARHL2	BarH-like homeobox 2		AJ251753			1p22.2
BCOR	BCL6 corepressor		AF317391	NM_017745	FLJ20285, KIAA1575	Xp11.4
BEST1	bestrophin 1	VMD2	AF057170	NM_004183	BMD, BEST	11q12
BHLHA9	basic helix-loop-helix family, member a9			XM_001125971	bHLHa9, BHLHF42	17p13.3
BHLHE22	basic helix-loop-helix family, member e22	TNRC20, BHLHB5	CAGL85, Beta3, bHLHe22	NM_152414	U80755	8q12.1
BHLHE40	basic helix-loop-helix family, member e40	STRA13, BHLHB2	AB004066	NM_003670	DEC1, bHLHe40	3p26
BMI1	BMI1 polycomb ring finger oncogene	PCGF4	BC011652	NM_005180	RNF51	10p13
BMP2	bone morphogenetic protein 2	BMP2A				20p12
BMP4	bone morphogenetic protein 4	BMP2B	AF035427	NM_001202		14q22-q23
BMP7	bone morphogenetic protein 7				OP-1	20q13
BMPR1A	bone morphogenetic protein receptor, type IA	ACVRLK3	BC028383	NM_004329	ALK3, CD292	10q22.3
BMPR1B	bone morphogenetic protein receptor, type IB		D89675	NM_001203	ALK6, CDw293	4q23-q24
CASP3	caspase 3, apoptosis-related cysteine peptidase		BC016926	NM_004346	CPP32, CPP32B, Yama, apopain	4q34
CASP6	caspase 6, apoptosis-related cysteine peptidase		U20536	NM_001226	MCH2	4q25
CASZ1	castor zinc finger 1		AK000328	NM_017766	FLJ20321, ZNF693, castor, cst, SRG	1p36.22
CDH1	cadherin 1, type 1, E-cadherin (epithelial)	UVO	L08599	NM_004360	uvomorulin, CD324	16q22.1
CDH2	cadherin 2, type 1, N-cadherin (neuronal)	NCAD	S42303	NM_001792	CDHN, CD325	18q12.1
CDH20	cadherin 20, type 2		AF217289	NM_031891	CDH7L3, Cdh7	18q21.33
CDIPT	CDP-diacylglycerol--inositol 3-phosphatidyltransferase		AF014807	NM_006319	PIS1, PIS	16p12.1
CDS1	CDP-diacylglycerol synthase (phosphatidate cytidylyltransferase) 1		U65887			4q21
CHD7	chromodomain helicase DNA binding protein 7		AB037837	XM_098762	KIAA1416, FLJ20357, FLJ20361	8q12.2
CHRD	chordin		AF076612	NM_003741		3q27
CHST15	carbohydrate (N-acetylgalactosamine 4-sulfate 6-O) sulfotransferase 15		AB011170	NM_015892	GALNAC4S-6ST, BRAG, KIAA0598	10q26
CHST5	carbohydrate (N-acetylglucosamine 6-O) sulfotransferase 5		AF176839	NM_012126	I-GLCNAC-6-ST, FLJ22167	16q23.1
CNBP	CCHC-type zinc finger, nucleic acid binding protein	DM2, ZNF9	U19765	NM_003418	RNF163, ZCCHC22, CNBP1	3q21
CPNE5	copine V		H09181	NM_020939	CPN5, COPN5, KIAA1599	6p21.2
CRABP2	cellular retinoic acid binding protein 2		BC001109	NM_001878	CRABP-II	1q21.3
CRK	v-crk sarcoma virus CT10 oncogene homolog (avian)		D10656	NM_016823		17p13
CRMP1	collapsin response mediator protein 1		D78012	NM_001313	DRP-1, DPYSL1	4p16.1
CRX	cone-rod homeobox	CORD2	AF024711	NM_000554	CRD, LCA7, OTX3	19q13.3
CRYAA	crystallin, alpha A	CRYA1			HSPB4	21q22.3
CRYAB	crystallin, alpha B	CRYA2			HSPB5	11q22.3-q23.1
CRYBB2	crystallin, beta B2	CCA2, CRYB2A, CRYB2		NM_000496		22q11.23
CRYGA	crystallin, gamma A	CRYG1		NM_014617	CRYG5, CRY-g-A	2q33-q35
CRYGB	crystallin, gamma B	CRYG2		NM_005210		2q33-q35
CRYGD	crystallin, gamma D	CRYG4		NM_006891		2q33-q35
CRYGS	crystallin, gamma S	CRYG8		NM_017541		3
CSMD1	CUB and Sushi multiple domains 1			NM_033225	KIAA1890, PPP1R24	8p23.2
CSNK1E	casein kinase 1, epsilon			NM_001894	HCKIE, CKIE, CKIepsilon	22q13.1
CSPG5	chondroitin sulfate proteoglycan 5 (neuroglycan C)		AF059274	NM_006574	NGC	3p21.3
CTNNBIP1	catenin, beta interacting protein 1		AB021262	NM_020248	ICAT, MGC15093	1pter-p36.31
CYP1B1	cytochrome P450, family 1, subfamily B, polypeptide 1	GLC3A	U56438	NM_000104	CP1B	2p22.2
CYP26A1	cytochrome P450, family 26, subfamily A, polypeptide 1		AF005418		P450RAI, CP26, CYP26, P450RAI1	10q23-q24
CYP26B1	cytochrome P450, family 26, subfamily B, polypeptide 1			NM_019885	P450RAI-2	2p12
CYP26C1	cytochrome P450, family 26, subfamily C, polypeptide 1			NM_183374		10q23.33
DAAM1	dishevelled associated activator of morphogenesis 1		AB014566	NM_014992	KIAA0666	14q22.3
DAB1	disabled homolog 1 (Drosophila)		BC067445	NM_021080		1p32-p31
DACH1	dachshund homolog 1 (Drosophila)	DACH	AJ005670	NM_004392		13q22
DACH2	dachshund homolog 2 (Drosophila)		AF428101	NM_053281		Xq21.3
DACT1	dapper, antagonist of beta-catenin, homolog 1 (Xenopus laevis)		AF251079	NM_016651	DAPPER1, THYEX3, HDPR1, DAPPER, FRODO	14q22.3
DBX1	developing brain homeobox 1			NM_001029865		11p15.1
DECR1	2,4-dienoyl CoA reductase 1, mitochondrial	DECR	L26050		SDR18C1	8q21.3
DECR2	2,4-dienoyl CoA reductase 2, peroxisomal		AJ293009	NM_020664	PDCR, SDR17C1	16p13.3
DICER1	dicer 1, ribonuclease type III		Dicer, KIAA0928, K12H4.8-LIKE, HERNA		AB028449	14q32.2
DIXDC1	DIX domain containing 1		AB051522		KIAA1735	11q23.1
DKK1	dickkopf 1 homolog (Xenopus laevis)				SK, DKK-1	10q11.2
DKK2	dickkopf 2 homolog (Xenopus laevis)		AB033208			4q25
DKK3	dickkopf 3 homolog (Xenopus laevis)		AF177396	NM_013253	REIC, RIG	11p15.3
DMBX1	diencephalon/mesencephalon homeobox 1	OTX3	AB037699		PAXB	1p34.1
EBF1	early B-cell factor 1	EBF	AF208502	NM_024007	OLF1	5q34
EFHD1	EF-hand domain family, member D1			NM_025202	FLJ13612	2q37.1
EFNB1	ephrin-B1	EPLG2, CFNS	U09303	NM_004429	LERK2, Elk-L	Xq12
EFNB2	ephrin-B2	EPLG5	L38734	NM_004093	LERK5, Htk-L, HTKL, MGC126226, MGC126227, MGC126228	13q33
EGR1	early growth response 1		M62829	NM_001964	TIS8, G0S30, NGFI-A, KROX-24, ZIF-268, AT225, ZNF225	5q23-q31
EHD1	EH-domain containing 1	PAST1	AF099011	NM_006795	H-PAST, HPAST1, FLJ42622, FLJ44618	11q13
EIF2AK3	eukaryotic translation initiation factor 2-alpha kinase 3		AF110146	NM_004836	PEK, PERK	2p12
ELF3	E74-like factor 3 (ets domain transcription factor, epithelial-specific )	ESX	AF016295	NM_004433	EPR-1, ESE-1, ERT	1q32.2
EMX1	empty spiracles homeobox 1		X68879			2p13.2
EMX2	empty spiracles homeobox 2		AF301598	NM_004098		10q26.11
EN1	engrailed homeobox 1		L12699			2q14.2
EN2	engrailed homeobox 2			NM_001427		7q36.2
ENO2	enolase 2 (gamma, neuronal)		M22349			12p13
EOMES	eomesodermin		BC025363	NM_005442	TBR2	3p24.1
EPHB2	EPH receptor B2	DRT, ERK, EPHT3	AF025304	NM_017449	Hek5, Tyro5	1p36.1-p35
ETV1	ets variant 1			NM_004956	ER81	7p22
ETV6	ets variant 6		BC043399	NM_001987	TEL	12p13
EVX1	even-skipped homeobox 1					7p15.2
EXT1	exostosin 1	LGCR, LGS	S79639		ttv	8q24.11
EYA1	eyes absent homolog 1 (Drosophila)	BOR	AJ000098	NM_000503, NM_172060		8q13.3
FAM208B	family with sequence similarity 208, member B	C10orf18	FLJ20360, bA318E3.2, KIAA2006	NM_017782	BX649177	10p15.1
FAT1	FAT tumor suppressor homolog 1 (Drosophila)	FAT	X87241	NM_005245	CDHF7, CDHR8	4q35.2
FAT4	FAT tumor suppressor homolog 4 (Drosophila)		AY356402	NM_024582	CDHF14, FAT-J, CDHR11	4q28.1
FBXO18	F-box protein, helicase, 18		AK095343	NM_032807	FBH1, FLJ14590, Fbx18	10p15.1
FGF1	fibroblast growth factor 1 (acidic)	FGFA	X59065	NM_000800	AFGF, ECGF, ECGFA, ECGFB, HBGF1, ECGF-beta, FGF-alpha, GLIO703	5q31.3-q33.2
FGF10	fibroblast growth factor 10			NM_004465		5p13-p12
FGF17	fibroblast growth factor 17		AB009249	NM_003867	FGF-13	8p21.3
FGF18	fibroblast growth factor 18		AB007422	NM_033649, NM_003862	FGF-18, ZFGF5	5q34
FGF19	fibroblast growth factor 19		AB018122	NM_005117		11q13.1
FGF2	fibroblast growth factor 2 (basic)	FGFB	J04513	NM_002006		4q26
FGF8	fibroblast growth factor 8 (androgen-induced)		D38752	NM_006119, NM_033165	AIGF	10q25-q26
FGF9	fibroblast growth factor 9 (glia-activating factor)		D14838			13q11-q12
FGFBP1	fibroblast growth factor binding protein 1		M60047	NM_005130	HBP17, FGFBP	4p15.32
FGFR1	fibroblast growth factor receptor 1	FLT2, KAL2	M34185		H2, H3, H4, H5, CEK, FLG, BFGFR, N-SAM, CD331	8p12
FGFR2	fibroblast growth factor receptor 2	KGFR, BEK, CFD1, JWS	AK026508	NM_022976, NM_000141	CEK3, TK14, TK25, ECT1, K-SAM, CD332	10q25.3-q26
FGFR3	fibroblast growth factor receptor 3	ACH	M64347	NM_000142	CEK2, JTK4, CD333	4p16.3
FIGN	fidgetin		AK001267	NM_018086		2q24
FKBP8	FK506 binding protein 8, 38kDa		L37033	NM_012181	FKBP38, FKBPr38	19p12
FMR1	fragile X mental retardation 1	POF1, POF	X69962	NM_002024	FMRP, FRAXA, MGC87458	Xq27.3
FOXC1	forkhead box C1	FKHL7, IRID1	AF048693		FREAC3, ARA, IGDA, IHG1	6p25
FOXC2	forkhead box C2 (MFH-1, mesenchyme forkhead 1)	FKHL14	Y08223	NM_005251	MFH-1	16q24.1
FOXD1	forkhead box D1	FKHL8	U59831	NM_004472	FREAC4	5q12-q13
FOXE3	forkhead box E3	FKHL12	AF275722	NM_012186	FREAC8	1p32
FOXF1	forkhead box F1	FKHL5	U13219	NM_001451	FREAC1	16q24
FOXG1	forkhead box G1	FKHL2, FOXG1B, FKHL4, FKH2, FKHL1, FOXG1C, FKHL3, FOXG1A			HFK2, QIN, BF1, HFK1, HFK3, HBF-3	14q11-q13
FOXI3	forkhead box I3		BN001221, BN001222	NM_001135649		2p11.2
FOXK1	forkhead box K1		BK004104		IMAGE:5164497	7p22
FOXL1	forkhead box L1	FKHL11	AF315075	NM_005250	FREAC7, FKH6	16q24
FOXM1	forkhead box M1	FKHL16	Y12773	NM_021953	HFH-11, trident, HNF-3, INS-1, MPP2, MPHOSPH2, TGT3	12p13
FOXN2	forkhead box N2	HTLF		NM_002158		2p22-p16
FOXN3	forkhead box N3	C14orf116, CHES1		NM_005197		14q24.3-q31
FOXN4	forkhead box N4		AF425596	XM_062735		12q24.12
FOXO3	forkhead box O3	FKHRL1, FOXO3A	AF032886		AF6q21, FOXO2	6q21
FOXP1	forkhead box P1		AF146696	NM_032682	QRF1, 12CC4, HSPC215, hFKH1B	3p14.1
FOXP2	forkhead box P2	TNRC10, SPCH1	U80741	NM_014491	CAGH44	7q31
FOXP4	forkhead box P4		AB080747	NM_138457	FLJ40908	6p21.1
FOXS1	forkhead box S1	FKHL18	AF042831	NM_004118	FREAC10	20q11.1-q11.2
FRAS1	Fraser syndrome 1		AB040933		FLJ22031, FLJ14927, KIAA1500	4q21
FREM1	FRAS1 related extracellular matrix 1	C9orf154	AK058190	NM_144966	FLJ25461, C9orf145, C9orf143, DKFZp686M16108, TILRR	9p22.3
FREM2	FRAS1 related extracellular matrix protein 2		BX538150	NM_207361	DKFZp686J0811	13q13.3
FRS2	fibroblast growth factor receptor substrate 2		AF036717	NM_006654	SNT-1, FRS2alpha, SNT1, FRS2A	12q15
FUZ	fuzzy homolog (Drosophila)		BC016793	NM_025129	FLJ22688, Fy	19q13.33
FZD10	frizzled family receptor 10		AB027464		CD350	12q24.33
FZD2	frizzled family receptor 2		L37882	NM_001466		17q21.1
FZD3	frizzled family receptor 3		AJ272427	NM_145866		8p21
FZD5	frizzled family receptor 5	C2orf31	U43318	NM_003468	HFZ5, DKFZP434E2135	2q33.3
FZD7	frizzled family receptor 7		AB010881	NM_003507	FzE3	2q33
FZD8	frizzled family receptor 8		AB043703	NM_031866		10p11.2
GAS1	growth arrest-specific 1			NM_002048		9q21.3-q22
GATA3	GATA binding protein 3		X55122	NM_001002295	HDR	10p15
GBX2	gastrulation brain homeobox 2		AF118452	NM_001485		2q37.2
GDF11	growth differentiation factor 11		AF100907		BMP-11	12q13.13
GDF2	growth differentiation factor 2		AF156891	NM_016204	BMP-9, BMP9	10q11.22
GDF3	growth differentiation factor 3		AF263538			12p13.1
GDF6	growth differentiation factor 6			NM_001001557	BMP13	8q22.1
GJA1	gap junction protein, alpha 1, 43kDa	ODDD, GJAL	BC026329	NM_000165	CX43, ODD, ODOD, SDTY3	6q22-q23
GJA3	gap junction protein, alpha 3, 46kDa	CZP3	AF075290	NM_021954	CX46	13q12.11
GJA8	gap junction protein, alpha 8, 50kDa	CAE1, CZP1, CAE	U34802	NM_005267	CX50	1q21.1
GJE1	gap junction protein, epsilon 1, 23kDa				CX23	6q24.1
GLI2	GLI family zinc finger 2			NM_005270	THP2, HPE9, THP1	2q14
GLIPR1L1	GLI pathogenesis-related 1 like 1		BC014603	NM_152779	MGC26856	12q21.1
GLIS3	GLIS family zinc finger 3	ZNF515	BC033899	NM_152629	MGC33662	9p24.2
GPC4	glypican 4		AF030186	NM_001448	K-glypican	Xq26.1
GPRC5A	G protein-coupled receptor, family C, group 5, member A	RAI3, GPCR5A	AF095448		RAIG1	12p13-p12.3
GPRC5C	G protein-coupled receptor, family C, group 5, member C		AF207989		RAIG-3	17q25
GRASP	GRP1 (general receptor for phosphoinositides 1)-associated scaffold protein		AC019244			12q13.13
GRIP1	glutamate receptor interacting protein 1		AJ133439			12q13.13
GULP1	GULP, engulfment adaptor PTB domain containing 1		AF191771	NM_016315	CED6, CED-6, GULP	2q32.3-q33
HCCS	holocytochrome c synthase				CCHL	Xp22
HES1	hairy and enhancer of split 1, (Drosophila)	HRY	L19314		FLJ20408, HES-1, Hes1, bHLHb39	3q28-q29
HES2	hairy and enhancer of split 2 (Drosophila)		AL031848	NM_019089	bHLHb40	1p36.31
HES5	hairy and enhancer of split 5 (Drosophila)		AL139246		bHLHb38	1p36
HESX1	HESX homeobox 1		AF059734		RPX, ANF	3p14.3
HEY2	hairy/enhancer-of-split related with YRPW motif 2		AJ249545		bHLHb32, HERP1	6q
HHEX	hematopoietically expressed homeobox	PRHX	Z21533		HEX, HOX11L-PEN	10q23.33
HHIP	hedgehog interacting protein		AK024645		HIP, FLJ20992	4q31.21-q31.3
HIC1	hypermethylated in cancer 1			NM_006497	ZBTB29, ZNF901	17p13.3
HMBOX1	homeobox containing 1		AY522342	NM_024567	HNF1LA, PBHNF, FLJ21616	8p12
HMGA1	high mobility group AT-hook 1	HMGIY	AF176039	NM_145899		6p21
HMGA2	high mobility group AT-hook 2	HMGIC	U28754	NM_003483	BABL, LIPO	12q15
HMX1	H6 family homeobox 1		M99587	NM_018942	H6, NKX5-3	4p16.1
HOXA1	homeobox A1	HOX1F, HOX1				7p15.2
HRAS	v-Ha-ras Harvey rat sarcoma viral oncogene homolog	HRAS1		NM_176795	AJ437024	11p15.5
ID3	inhibitor of DNA binding 3, dominant negative helix-loop-helix protein		X69111	NM_002167	HEIR-1, bHLHb25	1p36.13-p36.12
ID4	inhibitor of DNA binding 4, dominant negative helix-loop-helix protein		U16153	NM_001546	bHLHb27	6p22.3
IFITM1	interferon induced transmembrane protein 1	IFI17	J04164	NM_003641	9-27, CD225	11p15.5
IFT172	intraflagellar transport 172 homolog (Chlamydomonas)		AB033005	NM_015662	SLB, wim, osm-1	2p23.3
IGDCC3	immunoglobulin superfamily, DCC subclass, member 3	PUNC	AF063936	NM_004884	HsT18880	15q22.3-q23
IGSF11	immunoglobulin superfamily, member 11		AB079879		BT-IgSF, MGC35227, Igsf13, VSIG3, CT119	3q21.2
INPP5E	inositol polyphosphate-5-phosphatase, 72 kDa	JBTS1	AF187891	NM_019892	PPI5PIV, CORS1	9q34.3
INSM1	insulinoma-associated 1			NM_002196	IA-1	20p11.2
IRX3	iroquois homeobox 3		U90308		IRX-1	16q12.2
ITGA3	integrin, alpha 3 (antigen CD49C, alpha 3 subunit of VLA-3 receptor)	MSK18	M59911	NM_005501	CD49c, VLA3a, VCA-2, GAP-B3	17q21.33
JAG1	jagged 1	AGS, JAGL1	U61276	NM_000214	AHD, AWS, HJ1, CD339	20p12.1-p11.23
JMJD6	jumonji domain containing 6	PTDSR	AB011157	NM_015167	PTDSR1, KIAA0585	17q25
KIAA1586	KIAA1586		AB046806	XM_166451		6p12.1
KIF21A	kinesin family member 21A	FEOM1	AK000059	NM_017641	FLJ20052	12q12
KLF6	Kruppel-like factor 6	BCD1, ST12, COPEB	U51869		CPBP, GBF, Zf9, PAC1	10p15
LEF1	lymphoid enhancer-binding factor 1				TCF1ALPHA, TCF10, TCF7L3	4q23-q25
LEFTY1	left-right determination factor 1	LEFTB	AF081507	NM_020997	LEFTYB	1q42.1
LEFTY2	left-right determination factor 2	TGFB4, EBAF	U81523	NM_003240	LEFTA, LEFTYA	1q42.1
LEPREL1	leprecan-like 1			NM_018192	FLJ10718, MLAT4, P3H2	3q29
LGR5	leucine-rich repeat containing G protein-coupled receptor 5	GPR67, GPR49	AF062006	NM_003667	HG38, FEX	12q22-q23
LHX2	LIM homeobox 2		U11701		LH-2, hLhx2	9q33.3
LIM2	lens intrinsic membrane protein 2, 19kDa			NM_030657	MP19, MP17	19q13.4
LIX1	Lix1 homolog (chicken)	C5orf11		NM_153234		5q15
LMO2	LIM domain only 2 (rhombotin-like 1)	RBTNL1	X61118	NM_005574	TTG2, RHOM2, RBTN2	11p13
LRP5	low density lipoprotein receptor-related protein 5	LRP7, OPPG, EVR1	AF064548	NM_002335	LR3, BMND1, HBM, OPS	11q13.4
LRP6	low density lipoprotein receptor-related protein 6		AF074264			12p13.2
LRRTM4	leucine rich repeat transmembrane neuronal 4		AK122612	NM_024993	FLJ12568	2p12
MAB21L1	mab-21-like 1 (C. elegans)		BC028170	NM_005584	CAGR1	13q13.3
MAB21L2	mab-21-like 2 (C. elegans)		AF155219	NM_006439		4q31
MACROD2	MACRO domain containing 2	C20orf133	BC101218	NM_080676	dJ631M13.5	20p12.1
MAF	v-maf musculoaponeurotic fibrosarcoma oncogene homolog (avian)				c-MAF	16q22-q23
MAP3K1	mitogen-activated protein kinase kinase kinase 1, E3 ubiquitin protein ligase	MEKK1	U29671, AF042838	XM_042066	MEKK, MAPKKK1	5q11.2
MAPK1	mitogen-activated protein kinase 1	PRKM2, PRKM1	ERK, ERK2, p41mapk, MAPK2		M84489	22q11.2
MARCKSL1	MARCKS-like 1	MLP	AF031640	NM_023009	F52, MacMARCKS, MLP1	1p35.1
MEGF9	multiple EGF-like-domains 9	EGFL5	AB011542	NM_001080497		9q32-q33.3
MEIS1	Meis homeobox 1			NM_002398		2p14
MEIS2	Meis homeobox 2		AF017418	NM_170677	MRG1, HsT18361	15q14
MEIS3	Meis homeobox 3		BC025404	XM_085929	MRG2, DKFZp547H236	19q13.32
MFRP	membrane frizzled-related protein		AB055505	NM_031433	FLJ30570, rd6, NNO2, C1QTNF5	11q23.1
MIP	major intrinsic protein of lens fiber			NM_012064	MP26, LIM1, AQP0	12q13
MITF	microphthalmia-associated transcription factor	WS2A, WS2		NM_198159	MI, bHLHe32	3p14.1-p12.3
MMP9	matrix metallopeptidase 9 (gelatinase B, 92kDa gelatinase, 92kDa type IV collagenase)	CLG4B				20q12-q13
MSI1	musashi homolog 1 (Drosophila)		AB012851	NM_002442		12q24
MSX2	msh homeobox 2	PFM1	D26145		CRS2, FPP, HOX8, MSH, PFM	5q35.2
MVP	major vault protein		X79882	NM_005115	LRP, VAULT1	16p11.2
MYO1C	myosin IC		X98507		myr2	17p13.3
NAT2	N-acetyltransferase 2 (arylamine N-acetyltransferase)	AAC2	D90042	NM_000015		8p22
NDST1	N-deacetylase/N-sulfotransferase (heparan glucosaminyl) 1	HSST	U18918	NM_001543	NST1	5q33.1
NDST2	N-deacetylase/N-sulfotransferase (heparan glucosaminyl) 2		U36601	NM_003635	NST2, HSST2	10q22
NDST3	N-deacetylase/N-sulfotransferase (heparan glucosaminyl) 3		AF074924	NM_004784	HSST3	4q26
NET1	neuroepithelial cell transforming 1		AJ010046	NM_005863	ARHGEF8, NET1A	10p15
NEUROD1	neuronal differentiation 1	NEUROD	U50823	NM_002500	BETA2, BHF-1, NeuroD, bHLHa3, MODY6	2q32
NEUROG2	neurogenin 2		AF303002	NM_024019	Atoh4, Math4A, ngn-2, bHLHa8	4q25
NGFR	nerve growth factor receptor		M14764		TNFRSF16, CD271, p75NTR	17q21-q22
NKX2-8	NK2 homeobox 8	NKX2H			NKX2.8, Nkx2-9	14q13.3
NLK	nemo-like kinase		AF197898	NM_016231		17q11.2
NNAT	neuronatin			NM_005386	Peg5	20q11.2-q12
NOG	noggin	SYNS1, SYM1	U31202	NM_005450		17q22
NOTCH1	notch 1	TAN1	AF308602	NM_017617		9q34.3
NOTCH4	notch 4	INT3				6p21.3
NPM1	nucleophosmin (nucleolar phosphoprotein B23, numatrin)		M26697	NM_002520	B23, NPM	5q35.1
NPTX2	neuronal pentraxin II			NM_002523		7q21.3-q22.1
NR0B1	nuclear receptor subfamily 0, group B, member 1	AHC, DSS	S74720	NM_000475	DAX1, AHCH	Xp21.3
NR2E1	nuclear receptor subfamily 2, group E, member 1	TLX	Y13276		TLL, XTLL	6q21
NR2E3	nuclear receptor subfamily 2, group E, member 3				PNR, rd7, RP37	15q24
NR2F1	nuclear receptor subfamily 2, group F, member 1	ERBAL3, TFCOUP1	BC004154	NM_005654	EAR-3, COUP-TFI, TCFCOUP1, SVP44	5q14
NR2F2	nuclear receptor subfamily 2, group F, member 2	ARP1, TFCOUP2	M64497		COUP-TFII, COUPTFB, SVP40, NF-E3	15q26
NR4A1	nuclear receptor subfamily 4, group A, member 1	HMR, GFRP1	L13740		TR3, N10, NAK-1, NGFIB, NUR77	12q13
NR5A2	nuclear receptor subfamily 5, group A, member 2	FTF	U93553		FTZ-F1beta, hB1F, LRH-1, FTZ-F1, hB1F-2, B1F2	1q32.11
NRP2	neuropilin 2		AF016098		VEGF165R2	2q33.3
NRXN1	neurexin 1		AB011150		KIAA0578, Hs.22998	2p16.3
NRXN2	neurexin 2			NM_015080		11q13
NTN1	netrin 1		U75586		NTN1L	17p13-p12
NUDT11	nudix (nucleoside diphosphate linked moiety X)-type motif 11		AK001490		DIPP3b, FLJ10628, hDIPP3beta	Xp11.22-p11.1
OFCC1	orofacial cleft 1 candidate 1		AF548113	NM_153003	MRDS1	6p24.3
OLFM3	olfactomedin 3		AF397392		NOE3	1p22
OLFML1	olfactomedin-like 1		AY358591	NM_198474	UNQ564	11p15
OLFML2B	olfactomedin-like 2B		BX648975	NM_015441	DKFZP586L151	1q23.1
OLIG1	oligodendrocyte transcription factor 1		AP000109	NM_138983	BHLHB6, bHLHe21	21q22.11
OLIG2	oligodendrocyte lineage transcription factor 2	PRKCBP2, BHLHB1	U48250	NM_005806	RACK17, OLIGO2, bHLHe19	21q22.11
OPTN	optineurin	GLC1E	AF420371	NM_021980	FIP2, HYPL, TFIIIA-INTP, NRP, HIP7	10p14
OTX1	orthodenticle homeobox 1					2p15
OTX2	orthodenticle homeobox 2		AF298117	NM_021728.		14q22.3
PAX2	paired box 2					10q24.31
PAX3	paired box 3	WS1			HUP2	2q36.1
PAX6	paired box 6	AN2	AY707088	NM_001604	D11S812E, AN, WAGR	11p13
PAX8	paired box 8		X69699			2q13
PBX4	pre-B-cell leukemia homeobox 4		AJ300182			19p12
PEA15	phosphoprotein enriched in astrocytes 15		Y13736	NM_003768	HMAT1, MAT1, PED, PEA-15, MAT1H, HUMMAT1H	1q21.1
PFKP	phosphofructokinase, platelet		AK092597	NM_002627	PFK-C, PFKF	10p15.3-p15.2
PFN2	profilin 2		L10678	NM_002628		3q25.1
PGAP1	post-GPI attachment to proteins 1			NM_024989	FLJ12377, Bst1	2q33.1
PIP	prolactin-induced protein			NM_002652	GCDFP-15, GCDFP15, GPIP4	7q32-qter
PITPNA	phosphatidylinositol transfer protein, alpha	PITPN	M73704		VIB1A	17p13.3
PITRM1	pitrilysin metallopeptidase 1		AB029027		MP1, KIAA1104, hMP1, PreP	10p15.2
PITX2	paired-like homeodomain 2	IRID2, IHG2, RIEG, RIEG1, RGS	U69961		IGDS, RS, Brx1, Otlx2, ARP1	4q25
PITX3	paired-like homeodomain 3					10q24.32
PKNOX1	PBX/knotted 1 homeobox 1		PREP1			21q22.3
PKNOX2	PBX/knotted 1 homeobox 2		AK023136			11q24.2
PLCE1	phospholipase C, epsilon 1			NM_016341	KIAA1516, PLCE, NPHS3	10q23
PLXDC1	plexin domain containing 1		AF279144	NM_020405	TEM3, TEM7	17q21.1
PLXNC1	plexin C1		AF030339		VESPR, CD232	12q23
PMEL	premelanosome protein	SIL, SILV	AK092881	NM_006928	D12S53E, SI, Pmel17, gp100	12q13-q14
PORCN	porcupine homolog (Drosophila)		AF317058	NM_022825	MG61, PORC, PPN, por	Xp11.23
POU2F1	POU class 2 homeobox 1	OTF1	BC001664	NM_002697	37165	1q24.2
POU5F1	POU class 5 homeobox 1	OTF3	Z11898	NM_002701	OCT3, Oct4, MGC22487	6p21.33
PPP4C	protein phosphatase 4, catalytic subunit			NM_002720	PP4, PPX	16p11.2
PRMT8	protein arginine methyltransferase 8	HRMT1L3, HRMT1L4	AF263539	NM_019854		12p13.3
PROM1	prominin 1	PROML1, MCDR2, STGD4	AF027208	NM_006017	AC133, CD133, RP41	4p15
PROX1	prospero homeobox 1		U44060	NM_002763		1q41
PRPF8	PRP8 pre-mRNA processing factor 8 homolog (S. cerevisiae)	RP13	AB007510		PRPC8, Prp8	17p13.3
PRR15	proline rich 15		BC029131	NM_175887		7p15.1
PRSS56	protease, serine, 56			NM_001195129		2q37.1
PTCH1	patched 1	NBCCS, PTCH	AI494442	NM_000264	BCNS	9q22.1-q31
PTCH2	patched 2		AF091501	NM_003738		1p34.1
PTK7	PTK7 protein tyrosine kinase 7		AF447176		CCK4	6p21.1-p12.2
PTPN11	protein tyrosine phosphatase, non-receptor type 11	NS1	D13540		BPTP3, SH-PTP2, SHP-2, PTP2C, SHP2	12q24.1
PYGO2	pygopus homolog 2 (Drosophila)		BC006132	NM_138300		1q22
QPRT	quinolinate phosphoribosyltransferase		D78177	NM_014298	QPRTase	16p11.2
RAB23	RAB23, member RAS oncogene family		AB034244			6p12.1
RAB3GAP1	RAB3 GTPase activating protein subunit 1 (catalytic)		D31886	NM_012233	RAB3GAP, KIAA0066, RAB3GAP130, WARBM1	2q21.3
RAB3GAP2	RAB3 GTPase activating protein subunit 2 (non-catalytic)		AB020646	NM_012414	RAB3-GAP150, KIAA0839, DKFZP434D245	1p36.13-p35.3
RAC1	ras-related C3 botulinum toxin substrate 1 (rho family, small GTP binding protein Rac1)		AJ132695	NM_018890	TC-25, p21-Rac1, Rac-1	7p22
RARA	retinoic acid receptor, alpha		X06538		RAR, NR1B1	17q21.1
RARB	retinoic acid receptor, beta		Y00291	NM_000965, NM_016152	HAP, NR1B2, RRB2	3p24
RARG	retinoic acid receptor, gamma		M57707	NM_000966	RARC, NR1B3	12q13
RAX	retina and anterior neural fold homeobox		AF115392		RX	18q21.31
RBM17	RNA binding motif protein 17		AF083384	NM_032905	SPF45, MGC14439	10p15.1
RBP1	retinol binding protein 1, cellular			NM_002899	CRABP-I, CRBP1, CRBP, RBPC, CRBPI	3q21-q23
RELA	v-rel reticuloendotheliosis viral oncogene homolog A (avian)	NFKB3	Z22951	NM_021975	p65	11q13
RGS16	regulator of G-protein signaling 16		U70426	NM_002928	A28-RGS14, RGS-r	1q25-q31
RGS2	regulator of G-protein signaling 2, 24kDa	G0S8	L13463	NM_002923		1q31
RHOA	ras homolog family member A	ARH12, ARHA	BC001360	NM_001664	RhoA, Rho12, RHOH12	3p21.3
RND2	Rho family GTPase 2	ARHN	X95456	NM_005440	Rho7, RhoN	17q21
RPGRIP1	retinitis pigmentosa GTPase regulator interacting protein 1	RPGRIP	AF227257	NM_020366	RGI1, LCA6	14q11
RPSA	ribosomal protein SA	LAMR1	S37431	NM_002295	LRP, 37LRP, p40, SA	3p21.3
RRH	retinal pigment epithelium-derived rhodopsin homolog		AF012270	NM_006583	peropsin	4q25
RTN4RL1	reticulon 4 receptor-like 1		AF532859	NM_178568	NGRH2, NgR3, DKFZp547J144	17p13.3
SALL3	sal-like 3 (Drosophila)		AJ007421	NM_171999	ZNF796	18q23
SCUBE1	signal peptide, CUB domain, EGF-like 1			NM_173050		22q13
SEMA3E	sema domain, immunoglobulin domain (Ig), short basic domain, secreted, (semaphorin) 3E	SEMAH	AB002329	NM_012431	M-SemaK, KIAA0331, coll-5	7q21.11
SEMA4C	sema domain, immunoglobulin domain (Ig), transmembrane domain (TM) and short cytoplasmic domain, (semaphorin) 4C	SEMAI	AB051526	NM_017789	Semacl1, Semaf	2q11.2
SEMA6A	sema domain, transmembrane domain (TM), and cytoplasmic domain, (semaphorin) 6A	SEMAQ	AB037789	NM_020796	KIAA1368, SEMA6A1, SEMA, HT018	5q23
SEMA6D	sema domain, transmembrane domain (TM), and cytoplasmic domain, (semaphorin) 6D		AF389430	NM_024966	KIAA1479, FLJ11598	15q21.1
SERPINF1	serpin peptidase inhibitor, clade F (alpha-2 antiplasmin, pigment epithelium derived factor), member 1	PEDF	M76979	NM_002615	EPC-1, PIG35	17p13.3
SERTAD3	SERTA domain containing 3		AF192529	NM_013368	RBT1	19q13.2
SEZ6L2	seizure related 6 homolog (mouse)-like 2		AY358404	NM_012410	PSK-1, FLJ90517	16p12.1
SFRP1	secreted frizzled-related protein 1		AF017987	NM_003012	SARP2, FRP, FRP-1	8p11.21
SFRP2	secreted frizzled-related protein 2		AF017986		SARP1, SDF-5, FRP-2	4q31.3
SFRP4	secreted frizzled-related protein 4		AF026692	NM_003014	frpHE, FRP-4, FRPHE	7p14.1
SGMS1	sphingomyelin synthase 1	TMEM23	AY280959	NM_147156	MOB, MGC17342, SMS1	10q11.2
SHH	sonic hedgehog	HPE3, HLP3		NM_000193	HHG1, SMMCI, TPT, TPTPS, MCOPCB5	7q36
SIX1	SIX homeobox 1	DFNA23	X91868			14q23.1
SIX3	SIX homeobox 3	HPE2	AF092047	NM_005413		2p21
SIX6	SIX homeobox 6	OPTX2	AF141651		Six9	14q23.1
SKI	v-ski sarcoma viral oncogene homolog (avian)		X15218	NM_003036		1p36.33
SMAD4	SMAD family member 4	MADH4	U44378	NM_005359	DPC4	18q21.1
SMO	smoothened, frizzled family receptor	SMOH	U84401	NM_005631	FZD11	7q32.1
SMOC1	SPARC related modular calcium binding 1		AJ249900			14q24.1
SOCS2	suppressor of cytokine signaling 2		AF037989		STATI2, SSI2, SOCS-2, SSI-2, CIS2, Cish2	12q
SOX1	SRY (sex determining region Y)-box 1			NM_005986		13q34
SOX13	SRY (sex determining region Y)-box 13			NM_005686	Sox-13, ICA12, MGC117216	1q32
SOX14	SRY (sex determining region Y)-box 14		AJ006230	NM_004189	SOX28	3q22-q23
SOX2	SRY (sex determining region Y)-box 2		BC013923	NM_003106		3q26.3-q27
SOX21	SRY (sex determining region Y)-box 21		AF107044	NM_007084	SOX25	13q31-q32
SOX3	SRY (sex determining region Y)-box 3	PHP				Xq27
SOX4	SRY (sex determining region Y)-box 4		AF070669	NM_003107		6p22.3
SOX8	SRY (sex determining region Y)-box 8		AF164104			16p13.3
SOX9	SRY (sex determining region Y)-box 9	CMD1, CMPD1	S74506	NM_000346	SRA1	17q23
SP1	Sp1 transcription factor		J03133			12q13.1
SP3	Sp3 transcription factor		M97191	NM_003111	SPR-2	2q31
SPINK1	serine peptidase inhibitor, Kazal type 1			NM_003122	Spink3, PCTT, PSTI, TATI	5q32
SPOCK3	sparc/osteonectin, cwcv and kazal-like domains proteoglycan (testican) 3		AJ001454		testican-3	4q32.3
SRGAP3	SLIT-ROBO Rho GTPase activating protein 3	SRGAP2	AB007871		KIAA0411, MEGAP, WRP, ARHGAP14	3p25.3
ST6GAL2	ST6 beta-galactosamide alpha-2,6-sialyltranferase 2	SIAT2	AB059555	NM_032528	KIAA1877, St6gal2, St6GalII	2q11-q12
STMN2	stathmin-like 2	SCGN10		NM_007029	SCG10	8q21.13
STMN3	stathmin-like 3		AF069709	NM_015894	SCLIP	20q13.3
STRA6	stimulated by retinoic acid gene 6 homolog (mouse)		AF352728		FLJ12541	15q24.1
STX3	syntaxin 3	STX3A	AJ002076	NM_004177		11q12.1
SULF1	sulfatase 1		AB029000	NM_015170	KIAA1077, SULF-1	8q13.1
SULF2	sulfatase 2		AY101176	NM_018837	KIAA1247, HSULF-2, SULF-2	20q13.12-q13.13
SUPT5H	suppressor of Ty 5 homolog (S. cerevisiae)		U56402	NM_003169	SPT5H, SPT5, FLJ34157	19q13
SV2C	synaptic vesicle glycoprotein 2C		AB028977			5q13
SYT9	synaptotagmin IX		AK055003	NM_175733		11p15.4
TBX2	T-box 2		AB209378	NM_005994		17q23.2
TBX20	T-box 20		AJ237589	NM_020417		7p14.3
TBX3	T-box 3	UMS	BC025258	NM_016569, NM_005996	TBX3-ISO, XHL	12q24.1
TBX5	T-box 5	HOS	U89353	NM_080717		12q24.1
TCF12	transcription factor 12		HEB, HTF4, HsT17266, bHLHb20	NM_003205	BC050556	15q21
TCF3	transcription factor 3 (E2A immunoglobulin enhancer binding factors E12/E47)		M65214	NM_003200	E2A, ITF1, MGC129647, MGC129648, bHLHb21, VDIR, E47	19p13.3
TFAP2A	transcription factor AP-2 alpha (activating enhancer binding protein 2 alpha)	TFAP2, AP2TF	X52611	NM_003220	AP-2	6pter-p22.3
TFAP2C	transcription factor AP-2 gamma (activating enhancer binding protein 2 gamma)			NM_003222	AP2-GAMMA, ERF1, TFAP2G, hAP-2g	20q13.2
TFE3	transcription factor binding to IGHM enhancer 3		X96717	NM_006521	TFEA, bHLHe33	Xp11.22
THBS1	thrombospondin 1			NM_003246	TSP1, THBS, TSP, THBS-1, TSP-1	15q15
TIMP3	TIMP metallopeptidase inhibitor 3	SFD		NM_000362		22q12.3
TLE4	transducin-like enhancer of split 4 (E(sp1) homolog, Drosophila)		E(spI), ESG, GRG4	XM_212237	M99439	9q21.32
TMX3	thioredoxin-related transmembrane protein 3	TXNDC10	BX647846	NM_019022	FLJ20793, KIAA1830, PDIA13	18q22
TNFRSF19	tumor necrosis factor receptor superfamily, member 19		AB040434	NM_018647	TAJ-alpha, TROY, TAJ, TRADE	13q12.11-q12.3
TRPM1	transient receptor potential cation channel, subfamily M, member 1	MLSN1	AF071787	NM_002420	LTRPC1	15q13.3
TSHZ1	teashirt zinc finger homeobox 1	SDCCAG33	AF039698	NM_005786	NY-CO-33, TSH1	18q22.3
TSHZ2	teashirt zinc finger homeobox 2	C20orf17, ZNF218	AF230201	NM_173485	ZABC2, OVC10-2, TSH2	20q13.2
TSHZ3	teashirt zinc finger homeobox 3	ZNF537	AL136805	NM_020856	KIAA1474, TSH3	19q13.11
TWSG1	twisted gastrulation homolog 1 (Drosophila)		AA486291		TSG	18p11.3
UNC5A	unc-5 homolog A (C. elegans)		AB075856	XM_030300	KIAA1976, UNC5H1	5q35.3
UNC5B	unc-5 homolog B (C. elegans)		AB096256	NM_170744	UNC5H2, p53RDL1	10q22.2
VAX1	ventral anterior homeobox 1		AK127095	XM_301242		10q26.11
VAX2	ventral anterior homeobox 2		Y17791		DRES93	2p13.3
VSX1	visual system homeobox 1	PPCD	AF176797		PPD	20p11.21
VSX2	visual system homeobox 2	HOX10, CHX10	AC005519	NM_182894	RET1	14q24.3
WNT1	wingless-type MMTV integration site family, member 1	INT1	X03072			12q13
WNT2B	wingless-type MMTV integration site family, member 2B	WNT13	AB045116	NM_004185	XWNT2	1p13
WNT7A	wingless-type MMTV integration site family, member 7A		D83175	NM_004625		3p25
WNT7B	wingless-type MMTV integration site family, member 7B		AF416743	NM_058238		22q13
WNT8B	wingless-type MMTV integration site family, member 8B		X91940	NM_003393		10q24
YWHAE	tyrosine 3-monooxygenase/tryptophan 5-monooxygenase activation protein, epsilon polypeptide		U54778	NM_006761	FLJ45465	17p13.3
ZFP42	zinc finger protein 42 homolog (mouse)		AK056719	NM_174900	REX1, ZNF754	4q35.2
ZIC1	Zic family member 1		D76435	NM_003412	ZIC, ZNF201	3q24
ZIC5	Zic family member 5		AF378304	NM_033132		13q32.2
