# Supplementary material for: Targeted resequencing identifies PTCH1 as a major contributor to ocular developmental anomalies and extends the SOX2 regulatory network
Source: HighWire-hosted journal article supplement (doi:10.1101/gr.196048.115), 2016-02-18
Supplement: Supp_Table_8.xlsx [file Supp_Table_8.xlsx]

## Sheet: Feuil1
Supplementary Table 7 : Primers used
Quantitative PCR (CCE-Rx expression studies)
Gene	Forward primer	Reverse primer
Gapdh	AGGTCGGTGTGAACGGATTTG	GTAGACCATGTAGTTGAGGTCA
Ptch1	TGGGGCCTTCGCTGTGGGAT	ACTCGTCCACCAACTTCCACC
Quantitative PCR (zebrafish expression studies)
Gene	Forward primer	Reverse primer
actin	ATACCCCATTGAGCACGGTA	ACATACATGGCAGGGGTGTT
ptch1-p1 (primer set 1: exon 6-7)	CCCCCATTACAGTGGACCAA	TCAAAAGGCCCTGTGGTGTT
ptch1-p2 (primer set 2: exon 10-12)	ACACAGGTGTTGCCGTTCCT	GGATAAGGGCGGCCATAAAA
gli1	AGCCTGTCCTGGGCAGTGTA	CAGCTCTCCCAGTGGCAGTT
Quantitative PCR (ChIP)
Region	Forward primer	Reverse primer
Gapdh Control	CCATGAGTGGACCCTTCTTT	ATGGCATGGACTGTGGTCTA
Ptch1 Negative Control	CACAGGGAGGTAGGATGGTG	GGATTCACATCCTGGAGGTTT
Ptch1 SOX2 target sequence	AGAGGGGAGAGTTGGAGCAGCC	GTGGTCCCTCTACCCAGGGCC
PTCH1 molecular analysis
Exon	Forward primer	Reverse primer
M13PTCH1-Exon1	TGTAAAACGACGGCCAGTggcgatcccaaagagttaga	CAGGAAACAGCTATGACCcttccgcgaactggatgt
M13PTCH1-Exon2	TGTAAAACGACGGCCAGTcagagtggtccgtcccggag	CAGGAAACAGCTATGACCcctcccttctgcttcgtccc
M13PTCH1-Exon3	TGTAAAACGACGGCCAGTcccaagtggctcagcgtcat	CAGGAAACAGCTATGACCtgctcacacatcagccagtctc
M13PTCH1-Exon4	TGTAAAACGACGGCCAGTcccttcccagaagcagtccaa	GGGCTGCAATACAGAAGAGGcagctgggctgccctgaagt
M13PTCH1-Exon5	TGTAAAACGACGGCCAGTcctttaaccttgtaaac	CAGGAAACAGCTATGACCgcctcgtcttcgaaactacgaacatt
M13PTCH1-Exon6	TGTAAAACGACGGCCAGTggctaatgggaggtgtatggc	CAGGAAACAGCTATGACCtgcagatatgctggaaaggagca
M13PTCH1-Exon7	TGTAAAACGACGGCCAGTgttaggccggctaggtatga	CAGGAAACAGCTATGACCtggctagcgaggataacggttt
M13PTCH1-Exon8	TGTAAAACGACGGCCAGTcccatcaagttccctgaattgca	CAGGAAACAGCTATGACCgcgtcactgagcccggtgtat
M13PTCH1-Exon9	TGTAAAACGACGGCCAGTaggcaaacggcaaatgggaa	CAGGAAACAGCTATGACCactccagcgacaccagccct
M13PTCH1-Exon10	TGTAAAACGACGGCCAGTtacccacttccctgagggcg	CAGGAAACAGCTATGACCttcccatttgccgtttgcct
M13PTCH1-Exon11	TGTAAAACGACGGCCAGTccgagatgcagctcttggga	CAGGAAACAGCTATGACCtgaggttacggaagccctgc
M13PTCH1-Exon12	TGTAAAACGACGGCCAGTcccgaaagccatgcataaagg	CAGGAAACAGCTATGACCggcaggtggctctgtttccc
M13PTCH1-Exon13	TGTAAAACGACGGCCAGTgggaagcagcctctgtccaa	CAGGAAACAGCTATGACCcccaggtttgtgccttatcgg
M13PTCH1-Exon14a	TGTAAAACGACGGCCAGTtcctccatgtggcctcctca	CAGGAAACAGCTATGACCcagtggaggctggagtcgga
M13PTCH1-Exon14b	TGTAAAACGACGGCCAGTcagtggaggctggagtcgga	CAGGAAACAGCTATGACCtcctccatgtggcctcctca
M13PTCH1-Exon15	TGTAAAACGACGGCCAGTttgatctgtcgaagagaaacaggtcc	CAGGAAACAGCTATGACCggctgctgcagaaacagttca
M13PTCH1-Exon16	TGTAAAACGACGGCCAGTttctggtggtaggaacacgcc	CAGGAAACAGCTATGACCgagcagtggctggcagcag
M13PTCH1-Exon17	TGTAAAACGACGGCCAGTgcggtcactaacgtaggagg	CAGGAAACAGCTATGACCtcccaatgtgatagagtgcggg
M13PTCH1-Exon18	TGTAAAACGACGGCCAGTcggacctccgatactagtcgt	CAGGAAACAGCTATGACCccatggacctcaccacctcg
M13PTCH1-Exon19	TGTAAAACGACGGCCAGTtgtcagagggaagggtcgcc	CAGGAAACAGCTATGACCaccctgcactgcctacggct
M13PTCH1-Exon20a	TGTAAAACGACGGCCAGTcgtgggttaacgaaccctgt	CAGGAAACAGCTATGACCtctccttgcacacgcctgct
M13PTCH1-Exon20b	TGTAAAACGACGGCCAGTgtcgttggactagaacacttgtag	CAGGAAACAGCTATGACCcgtcgtggagcagtagcactg
M13PTCH1-Exon21	TGTAAAACGACGGCCAGTaacttacacttgacgccaacct	CAGGAAACAGCTATGACCgaacccgccctctagccctc
M13PTCH1-Exon22	TGTAAAACGACGGCCAGTttatgccgtgtcacgcgtcc	CAGGAAACAGCTATGACCcaaaccacaggaagatggca
M13PTCH1-Exon23a	TGTAAAACGACGGCCAGTcgggtgtaaatacccgtcgtcg	CAGGAAACAGCTATGACCgcgacagtcacggaggcaga
M13PTCH1-Exon23b	TGTAAAACGACGGCCAGTcctgccgttccggtcgtc	CAGGAAACAGCTATGACCgggtccagcgtgggatgt
