# Supplementary material for: Targeted resequencing identifies PTCH1 as a major contributor to ocular developmental anomalies and extends the SOX2 regulatory network
Source: HighWire-hosted journal article supplement (doi:10.1101/gr.196048.115), 2016-02-18
Supplement: Supp_Tables_2-7.docx [file Supp_Tables_2-7.docx]

**Supplementary Table 2:** Phenotypes of ODA patients

|  |  |  |  |  |  |  | **Family History** | |  |
| --- | --- | --- | --- | --- | --- | --- | --- | --- | --- |
| **Patient** | **Gender** | **Age**  **(years)** | **Ethnicity** | **Right Eye** | **Left Eye** | **Other** | **Maternal** | **Paternal** | **Consanguinity** |
| **P1** | M | 10 | E | Ano | Ano | Microcephaly  PMD | - | - | - |
| **P2** | M | 5 | E | Cat | Micro | - | - | - | - |
| **P3** | M | 9 | N-Af | - | Micro  Scl | Hypospadias  Ectopic Kidney | - | - | - |
| **P4** | M | 3 | E | Micro  MicroC  Cat  Col | Peters | PMD | - | - | + |
| **P5** | F | 43 | S-Am | Micro  Cat | Micr  Scl | - | Unk | Unk | Unk |
| **P6** | F | 6 | E | Micro  Col Cyst | Micro  Col Cyst | Short Stature  Left duplicated pyelocaliceal system  PMD | - | - | - |
| **P7** | M | 3 | N-Af | Micro | Micro | IUGR  Sex Amb  Arthrogryposis  PMD | - | - | - |
| **P8** | F | 5 | E | Micro  Col | Micro | IUGR  Partial CCA  ASD  PMD  Severe Kyphosis | - | - | - |
| **P9** | M | 6 | E | Micro  Scl | Ano | - | - | - | - |
| **P10** | F | 6 | E | Micro | Micro  Scl | - | - | - | - |
| **P11** | M | 5 | E | Micro  Col Cyst | Micro  Col | Pyriform sinus stenosis  SMMCI  GH deficiency | - | - | - |
| **P12** | M | 37 | E | Micro  Col | Micro  Col | - | - | - | - |
| **P13** | F | 9 | E | Micro | - | PMD | - | - | - |
| **P14** | M | 6 | E | Micro  Col | Micro  Col | - | Increased papillary excavation | - | - |
| **P15** | M | 4 | N-Af | Micro  Col | Micro  Col | CCH  ASD | - | - | - |
| **P16** | F | 5 | E | Peters | - | - | - | - | - |
| **P17** | F | 21 | E | A-R | A-R | Mild Dorsolumbar Scoliosis | - | - | - |
| **P18** | F | 14 | E | MG | MG | - | - | - | - |
| **P19** | F | 5 | E | Aniridia | Aniridia | CH  PMD | - | - | - |
| **P20** | F | 5 | E | Peters  A-R | Peters  A-R | - | Unilateral Peters  Embryotoxon | - | - |
| **P21** | M | 3 | E | Micro  Scl | Micro  Scl | PMD | - | Embryotoxon | - |
| **P22** | F | 10 | As | Peters | Peters | PMD | - | - | - |
| **C1*** | F | 3 | N-Af | Micro  Cat  Col | Micro  Cat  Col | - | - | - | - |
| **C2*** | M | 42 | E | Ano | Ano | Fallot tetralogy | - | - | - |
| **CC10**** | M | 12 | E | Peters | Peters | - | - | - | + |
| **CC44**** | F | 19 | Af-Am | Micro  Cat  Partial aniridia | Micro  Cat  Partial aniridia | - | Micro  Cat  Partial aniridia | - | - |

Ano: anophthalmia; Micro: microphthalmia; MicroC: microcornea; Cat: cataract; Scl: sclerocornea; Col: coloboma; Col Cyst: colobomatous cysts; A-R: Axenfeld-Rieger; MG: Morning Glory

PMD: Psychomotor Delay; IUGR: intra uterine growth retardation; Sex Amb: sexual ambiguity; CCA: corpus callosum agenesis; CCH: corpus callosum hypoplasia; ASD: atrial septal defect; SMMCI: Solitary median maxillary central incisor, CH: cerebellar hypoplasia; Unk: unknown

E: European; N-Af: North African; S-Am: South American; As: Asian; Af-Am: African-American

Patients carrying a *PTCH1* mutation are underlined

*Positive controls with known mutations in *VSX2* (C1) or *STRA6* (C2)

** Replication cohort patients 10 (CC10) and 44 (CC44)

**Supplementary Table 3:** Variant prioritization

| **Identified variants** | **Average over**  **24 samples** | **Standard**  **Deviation** |
| --- | --- | --- |
| Total variants | 2566 | 125 |
| High confidence variant calls | 2482 | 126 |
| After exclusion of known variants  (dbSNPv132 + HapMap + in-house) | 236 | 28 |
| After exclusion of non-genic - intronic variants | 10 | 3 |
| After exclusion of synonymous variants | 6 | 2 |
| Predicted damaging | 3 | 1 |
| Validated by Sanger Sequencing | 2.5  *(range 0-5)* | 1 |

A custom-made SureSelect oligonucleotide probe library was designed to capture the exons of 407 candidate genes and 880 kb of potential regulatory sequences. The mean coverage was 325X with 96.9% of the targeted sequences over 10X and 93.4 over 25X. Frameshift, nonsense and splicing variants were considered as damaging. Missense variants were classified as damaging or not based on Polyphen-2 software results.

**Supplementary Table 4:** Final prioritized variants in patients with ODA

| **Patient** | **Gene** | **Transcript** | **cDNA change** | **Protein change** | **Status** | **Polyphen-2** | **SIFT** | **EVS** | **Inheritance**  **(phenotype)** | **ClinVar accession number** |
| --- | --- | --- | --- | --- | --- | --- | --- | --- | --- | --- |
| **P1** | *PAX6* | ENST00000379115 | c.192C>A | p.Asn64Lys | Ht | D (1.000) | D (0) | Abs | *De novo* | SCV000259110 |
| **P3** | *FAT4* | ENST00000394329 | c.7960A>C | p.Lys2654Gln | Ht | P (0.477) | T(0.76) | Abs | Pat (Asy) | SCV000259111 |
| *MYO1C* | ENST00000359786 | c.391C>T | p.Arg131Cys | Ht | D (0.959) | T(0.17) | 3/13004 | Mat (Asy) | SCV000259112 |
| *SALL3* | ENST00000537592 | c.2254G>A | p.Val752Met | Ht | D (0.9555) | - | Abs | Mat (Asy) | SCV000259113 |
| *SOX14* | ENST00000306087 | c.722delA | p.*241Tyrext*? | Ht | - | - | Abs | Mat (Asy) | SCV000259114 |
| *TSHZ2* | ENST00000371497 | c.247T>G | p.Ser83Ala | Ht | D (0.946) | D(0) | 4/13006 | Pat (Asy) | SCV000259115 |
| **P4** | *FAT1* | ENST00000441802 | c.4336G>A | p.Val1446Ile | Ht | D(0.998) | T(0.36) | 8/11838 | Pat (Asy) | SCV000259116 |
| *FAT4* | ENST00000394329 | c.131A>C | p.Glu44Ala | Ht | P (0.496) | T(0.6) | 3/12132 | Mat,Pat (Asy) | SCV000259117 |
| *DAB1* | ENST00000371236 | c.1075G>A | p.Gly359Arg | Ht | D (0.987) | T(0.07) | Abs | Pat (Asy) | SCV000259118 |
| **P5** | ***PTCH1***  *PLXNC1*  *IFT172*  *WNT7A* | ENST00000375274  ENST00000258526  ENST00000260570  ENST00000285018 | c.4delG  c.3649T>C  c.3880C>T  c.232C>T | p.Glu2Asnfs*9  p.Cys1217Arg  p.Arg1294Cys  p.Arg78Cys | Ht  Ht  Ht  Ht | -  D(0.998)  D(1.000)  D(1.000) | -  D(0.01)  D(0.01  D(0) | Abs  9/12997  1/13005  Abs | Unk | SCV000259119 |
| SCV000259120 |
| SCV000259121 |
| SCV000259122 |
| **P6** | *STRA6* | ENST00000395105 | c.1735C>G | p.Pro579Ala | Hemi | D (0.999) | T(0.11) | Abs | Mat (Asy) | SCV000259123 |
| **P7** | *CDH1* | ENST00000261769 | c.670C>T | p.Arg224Cys | Ht | P (0.837) | D(0) | 2/12996 | Unk | SCV000259124 |
| *CYP26C1* | ENST00000285949 | c.1243C>G | p.His415Asp | Ht | D (1.000) | D(0) | Abs | SCV000259125 |
| *IFT172* | ENST00000260570 | c.5133delC | p.Trp1712Glyfs*20 | Ht | - | - | Abs | SCV000259126 |
| *VAX2* | ENST00000234392 | c.398C>T | p.Thr133Ile | Ht | P (0.933) | T(0.33) | Abs | SCV000259127 |
| **P8** | ***PTCH1***  *SEZ6L2* | ENST00000331920  ENST00000308713 | c.3191C>T  c.323C>T | p.Thr1064Met  p.Thr108Ile | Ht  Ht | D(1.000)  P(0.937) | T(0.1)  T(0.22) | 2/13006  Abs | Pat (Asy)  Pat (Asy) | SCV000259128 |
| SCV000259129 |
| **P9** | *RPGRIP1* | ENST00000400017 | c.2424C>G | p.Cys808Trp | Ht | D (0.999) | D(0) | Abs | Pat (Asy) | SCV000259130 |
| **P10** | *PFKP*  *NOTCH4* | ENST00000381125  ENST00000375023 | c.740dupG  c.2443T>G | p.Trp248Leufs*26  p.Cys815Gly | Ht  Ht | -  D(1.000) | -  D(0) | Abs  22/8350 | Mat (Asy)  Mat (Asy) | SCV000259131 |
| SCV000259132 |
| **P11** | *NR5A2*  *RPGRIP1* | ENST00000367362  ENST00000400017 | c.884C>T  c.808A>G | p.Thr295Met  p.Ile270Val | Ht  Ht | P(0.904)  P(0.994) | D(0.02)  T(0.11) | 11/12995  6/11846 | Unk | SCV000259133 |
| SCV000259134 |
| **P12** | *GRASP* | ENST00000293662 | c.1084G>A | p.Gly362Ser | Ht | D (0.987) | T(0.43) | 56/11118 | Mat (Asy) | SCV000259135 |
| *NOTCH1* | ENST00000277541 | c.2434G>A | p.Gly812Arg | Ht | D (1.000) | D(0.05) | 7/12560 | Pat (Asy) | SCV000259136 |
| **P13** | *MITF*  *EFHD1* | ENST00000352241  ENST00000264059 | c.736G>A  c.245C>T | p.Asp246Asn  p.Thr82Met | Ht  Ht | P(0.858)  D(0.945) | T(0.45)  T(0.06) | Abs  1/12893 | Mat (Asy)  Mat (Asy) | SCV000259137 |
| SCV000259138 |
| **P14** | *NOTCH1*  *ARR3* | ENST00000277541  ENST00000307959 | c.68G>T  c.1052C>T | p.Arg23Leu  p.Pro351Leu | Ht  Hemi | P(0.689)  D(0.945) | T(0.38)  T(1) | Abs  Abs | Mat (Sy)  Mat (Sy) | SCV000259139 |
| SCV000259140 |
| **P15** | *FGFR3*  ***PTCH1***  *SULF1*  *CHRD* | ENST00000260795  ENST00000331920  ENST00000458141  ENST00000204604 | c.1879G>A  c.3241G>A  c.529G>A  c.1370C>G | p.Glu627Lys  p.Val1081Met  p.Gly177Ser  Thr457Ser | Ht  Ht  Ht  Ht | D(0.990)  D(0.991)  D(1.000)  D(0.999) | D(0)  D(0.02)  D(0)  T(0.1) | Abs  1/13006  Abs  6/13000 | Pat (Asy) | SCV000259141 |
| SCV000259142 |
| SCV000259143 |
| SCV000259144 |
| **P17** | *CHST5* | ENST00000336257 | c.737T>C | p.Ile246Thr | Ht | D (0.998) | T(0.06) | Abs | Mat (Asy) | SCV000259145 |
| *DACT1* | ENST00000335867 | c.2010G>C | p.Lys670Asn | Ht | P (0.868) | T(0.32) | Abs | Mat (Asy) | SCV000259146 |
| *FRAS1* | ENST00000264895 | c.3700G>A | p. Ala1234Thr | Ht | P(0.611) | T(0.29) | 2/12336 | Pat (Asy) | SCV000259147 |
| **P18** | *DICER1*  *MAP3K1*  *GLI2* | ENST00000343455  ENST00000399503  ENST00000361492 | c.2191G>A  c.1420A>G  c.1859C>T | p.Gln731Lys  p.Ile474Val  p.Thr620Met | Ht  Ht  Ht | P(0.950)  P(0.540)  P(0.832) | T(0.52)  T(0.19)  T(0.09) | Abs  Abs  11/12995 | Unk | SCV000259149 |
| SCV000259150 |
| SCV000259151 |
| **P19** | *KIF21A*  *GLIS3* | ENST00000395670  ENST00000381971 | c.2287G>A  c.2710G>C | p.Val763Met  p.Gly904Arg | Ht  Ht | D(0.998)  D(1.000) | D(0.01)  D(0) | Abs  6/13000 | Pat (Asy)  Pat (Asy) | SCV000259152 |
| SCV000259153 |
| **P20** | ***PTCH1***  *FREM1* | ENST00000331920  ENST00000380880 | c.3947A>G  c.1493G>A | p.Tyr1316Cys  Arg498Gln | Ht  Ht | D(0.983)  D(1.000) | T(0.07)  T(0.43) | 9/12499  9/12453 | Mat (Sy)  Mat (Sy) | SCV000259154 |
| SCV000259155 |
| **P21** | *ADAM17* | ENST00000310823 | c.847C>T | p.Arg283Cys | Ht | D (1.000) | T(0.08) | Abs | Pat (sy) | SCV000259156 |
| *SFRP2* | ENST00000274063 | c.628A>G | p.Asn209Gly | Ht | P (0.918) | T(0.24) | Abs | Pat (sy) | SCV000259157 |
| *TSHZ2* | ENST00000371497 | c.1289A>T | p.Gln430Leu | Ht | P (0.958) | D(0.01) | Abs | Mat (Asy) | SCV000259158 |
| **P22** | *PITRM1* | ENST00000380989 | c.2423A>G | p.Lys808Arg | Ht | P (0.708) | T(0.48) | Abs | Pat (Asy) | SCV000259159 |
| *PRPF8* | ENST00000304992 | c.3527C>T | p.Ser1176Phe | Ht | D (0.999) | D(0) | Abs | Mat (Asy) | SCV000259160 |
| *RARG* | ENST00000425354 | c.245C>T | p.Pro82Leu | Ht | D (0.999) | D(0.02) | Abs | Pat (Asy) | SCV000259161 |
| *EPHB2* | ENST00000400191 | c.787G>A | p.Val263Ile | Ht | P(0.882) | T(0.24) | 2/13004 | Pat (Asy) | SCV000259162 |
| **C1*** | *FRAS1* | ENST00000264895 | c.9364C>T | p.Arg3122Trp | Ht | D (1.000) | D(0) | Abs | Pat (Asy) | SCV000259163 |
| *VSX2* | ENST00000261980 | c.71_72insG | p.Ala25Argfs*102 | Ht | - | - | Abs | Pat (Asy) | SCV000259164 |
| *VSX2* | ENST00000261980 | c.667G>A | p.Gly223Arg | Ht | D (1.000) | T(0.14) | Abs | Mat (Asy) | SCV000259165 |
| *NDST2* | ENST00000309979 | c.25C>T | p.Arg9Cys | Ht | D(1.000) | D(0) | 4/13002 | Pat (Asy) | SCV000259166 |
| *NDST2* | ENST00000309979 | c.199C>T | p.Arg67Trp | Ht | D(0.990) | T(0.18) | 1/12989 | Mat (Asy) | SCV000259167 |
| **C2*** | *STRA6* | ENST00000395105 | c.1313A>G | p.Gln438Arg | Ht | D (1.000) | D(0.05) | Abs | Pat (Asy) | SCV000259168 |
| *STRA6* | ENST00000395105 | c.1913G>C | p.Arg638Pro | Ht | D (1.000) | D(0) | 1/12990 | Mat (Asy) | SCV000259169 |

Ht: heterozygous; Hemi: hemizygous; Abs: absent; Unk: unknown; Pat: paternal; Mat: maternal; Asy: Asymptomatic; Sy: symptomatic

EVS: Exome variant server; Abs: absent; D: probably damaging; P: possibly damaging, B: probably benign; T: tolerated

*Positive controls with known mutations in *VSX2* (C1) or *STRA6* (C2)

**Supplementary Table 5:** Mutational burden of rare variants (<1% alternate allele frequency; not present in homozygosity) in genes with >1 predicted pathogenic variants (Frameshift, nonsense and splicing variants were considered as damaging; missense variants were classified as damaging or not based on Polyphen-2) in ODA cases (n=22 unknown + 2 positive controls) vs. Exome Variant Server (EVS) controls (n=6,500)

|  | **ODA**  **(n=48 chromosomes)** | | | | **EVS EA***  **(n=8600** chromosomes)** | | **EVS AA***  **(n=4406** chromosomes)** | | | | **EVS EA+AA**  **(n=13006 chromosomes)** | | **ODA vs. EVS EA+AA** |
| --- | --- | --- | --- | --- | --- | --- | --- | --- | --- | --- | --- | --- | --- |
| **Gene** | **Predicted pathogenic alleles** | | **Frequency**  **of mutational burden** | | **Predicted pathogenic alleles** | **Frequency**  **of mutational burden** | **Predicted pathogenic alleles** | **Frequency**  **of mutational burden** | | | **Predicted pathogenic alleles** | **Frequency**  **of mutational burden** | **p-value** |
| *PTCH1* | | 4 | | 0.083 | 88 | 0.010 | 69 | | 0.016 | 157 | | 0.012 | <0.0001 |
| *STRA6**** | | 3 | | 0.063 | 73 | 0.008 | 62 | | 0.014 | 135 | | 0.010 | 0.0049 |
| *VSX2**** | | 2 | | 0.042 | 15 | 0.002 | 37 | | 0.008 | 52 | | 0.004 | 0.0034 |
| *FAT4* | | 2 | | 0.042 | 458 | 0.053 | 267 | | 0.061 | 725 | | 0.056 | 0.9130 |
| *FRAS1* | | 2 | | 0.042 | 554 | 0.067 | 283 | | 0.072 | 837 | | 0.069 | 0.6469 |
| *IFT172* | | 2 | | 0.042 | 153 | 0.018 | 104 | | 0.024 | 257 | | 0.020 | 0.5701 |
| *NDST2* | | 2 | | 0.042 | 55 | 0.006 | 35 | | 0.008 | 90 | | 0.007 | 0.0446 |
| *NOTCH1* | | 2 | | 0.042 | 189 | 0.023 | 98 | | 0.024 | 287 | | 0.023 | 0.7092 |
| *RPGRIP1* | | 2 | | 0.042 | 114 | 0.014 | 80 | | 0.021 | 194 | | 0.016 | 0.4153 |

* EVS, Exome Variant Server; EA, European American; AA, African American

** Chromosome numbers were adjusted to the average number of calls across the gene if EVS displayed variant call data for <13006 chromosomes. Adjusted numbers- *STRA6* (EA, 8594; AA, 4396); *FRAS1* (EA, 8232; AA, 3918); *NOTCH1* (EA, 8322; AA, 4104); *RPGRIP1* (EA, 8138; AA,3792)

*** *STRA6* and *VSX2* each harbor known causal variants in the two positive control ODA individuals (C1 and C2)

**Supplementary Table 6: Morpholino and CRISPR guide RNA sequences used in this study**

| **Reagent** | **Sequence** | **Target** | **Reference** |
| --- | --- | --- | --- |
| *ptch1* sb1 | CTAGCAAATAAGCCATACCTGTTGT | e3i3 | Koudijs et al, 2005 |
| *ptch1* sb2 | AAGATATGTGTAACTTACGGGAGAT | e5i5 |  |
| *ptch1* tb | AGGAGACATTAACAGCCGAGGCCAT | ATG |  |
| *sox2* tb | GAGAGGCTGCTGAAGTTACCTTAGC | ATG | Kamachi et al, 2008 |
| *ptch1* guide RNA | GAAGCCCATCGGATCGAAGT | exon 6 |  |
|  |  |  | |  |

**Supplementary Table 7:** Somite angle measurements for *PTCH1* *in vivo* complementation assays.

|  |  | | | |  | | | |  | |
| --- | --- | --- | --- | --- | --- | --- | --- | --- | --- | --- |
| **Injection** | **Somite angle Measurements** | | | **p-values** | | | | **Pathogenicity** | |
| **n** | **Mean (°)** | **S.E.M.** | **vs. WT RNA** | | **vs. WT rescue** | **vs. MO** |
| **Controls** | 49 | 81.5 | 0.4 | 0.0037 | | <0.0001 | <0.0001 |  | |
| **MO** | 53 | 97.5 | 1.1 | <0.0001 | | <0.0001 |  |  | |
| **WT RNA** | 49 | 83.4 | 0.4 |  | |  |  |  | |
| **MO + WT RNA** | 50 | 85.9 | 0.7 | 0.0041 | |  |  |  | |
| **D436N RNA** | 53 | 81.6 | 0.8 | 0.0657 | |  | <0.0001 |  | |
| **MO + D436N RNA** | 50 | 84.1 | 0.6 |  | | 0.0530 | <0.0001 | Benign | |
| **T778P RNA** | 50 | 82.6 | 1.1 | 0.5122 | |  | <0.0001 |  | |
| **MO + T778P RNA** | 51 | 94.7 | 1.3 |  | | <0.0001 | 0.1046 | Pathogenic | |
| **I899V RNA** | 50 | 82.1 | 0.7 | 0.1572 | |  | <0.0001 |  | |
| **MO + I899V RNA** | 50 | 90.0 | 0.7 |  | | <0.0001 | <0.0001 | Pathogenic | |
| **T1064M RNA** | 50 | 86.3 | 0.8 | 0.0010 | |  | <0.0001 |  | |
| **MO + T1064M RNA** | 50 | 94.5 | 1.0 |  | | <0.0001 | 0.0481 | Pathogenic | |
| **V1081M RNA** | 45 | 83.9 | 0.9 | 0.6107 | |  | <0.0001 |  | |
| **MO + V1081M RNA** | 50 | 91.3 | 0.9 |  | | <0.0001 | <0.0001 | Pathogenic | |
| **R1297W RNA** | 49 | 83.2 | 1.0 | 0.8722 | |  | <0.0001 |  | |
| **MO + R1297W RNA** | 50 | 92.8 | 1.3 |  | | <0.0001 | 0.0075 | Pathogenic | |
| **Y1316C RNA** | 52 | 82.4 | 0.8 | 0.2986 | |  | <0.0001 |  | |
| **MO + Y1316C RNA** | 52 | 94.3 | 1.2 |  | | <0.0001 | 0.0482 | Pathogenic | |
| **T1052M* RNA** | 48 | 82.3 | 0.5 | 0.1121 | |  | <0.0001 |  | |
| **MO + T1052M* RNA** | 49 | 92.6 | 0.6 |  | | <0.0001 | 0.0003 | Pathogenic | |
| **L360R* RNA** | 38 | 86.1 | 0.8 | 0.0012 | |  | <0.0001 |  | |
| **MO + L360R* RNA** | 49 | 94.9 | 1.7 |  | | <0.0001 | 0.2032 | Pathogenic | |
| **G509V** RNA** | 58 | 91.7 | 0.7 | <0.0001 | |  | <0.0001 |  | |
| **MO + G509V** RNA** | 57 | 95.3 | 1.3 |  | | <0.0001 | 0.2228 | Dom. Negative | |
| **P1125L*** RNA** | 54 | 83.0 | 0.5 | 0.6199 | |  | <0.0001 |  | |
| **MO + P1125L*** RNA** | 54 | 82.9 | 0.5 |  | | 0.0009 | <0.0001 | Benign | |
| **P1315L*** RNA** | 50 | 79.9 | 0.5 | <0.0001 | |  | <0.0001 |  | |
| **MO + P1315L*** RNA** | 52 | 84.4 | 0.7 |  | | 0.1628 | <0.0001 | Benign | |

*Positive control (functional null): T1052M, Associated with holoprosencephaly (Ming et al. 2002); L360R, orthologous to mouse L346R, shown previously to be unable to complement PTCH1 function in murine *Ptch1-/-* fibroblast cells (Bailey et al. 2003).

**Positive control (dominant negative): G509V, located in the sterol-sensing domain of PTCH1 and shown previously to act as a dominant negative when assayed *in vivo* in *Drosophila* (Hime et al. 2004).

***Negative control (benign): P1315L, Common variant (30% minor allele frequency, present in homozygosity in 8% of control individuals in ESP6500); P1125L, orthologous to mouse P111L, shown previously to be able to complement PTCH1 function in murine *Ptch1-/-* fibroblast cells (Bailey et al 2003).
