# Supplementary material for: Targeted resequencing identifies PTCH1 as a major contributor to ocular developmental anomalies and extends the SOX2 regulatory network
Source: HighWire-hosted journal article supplement (doi:10.1101/gr.196048.115), 2016-02-18
Supplement: Supplemental_Table_Legends.docx [file Supplemental_Table_Legends.docx]

**Supplementary TABLES**

Supplementary Table 1: List of the 407 candidate genes

Supplementary Table 2: Phenotypes of ODA patients

Supplementary Table 3: Variant prioritization

Supplementary Table 4: Final prioritized variants in patients with ODA

Supplementary Table 5: Mutational burden of rare functional variants in ODA cases versus EVS controls.

Supplementary Table 6: Morpholino and guide RNA sequences used in this study

Supplementary Table 7: Somite angle measurements for PTCH1 *in vivo* complementation assays.

Supplementary Table 8: Primers used for qPCR and *PTCH1* mutational analysis
